# Supplementary material for: ReCombine: A Suite of Programs for Detection and Analysis of Meiotic Recombination in Whole-Genome Datasets
Source: PLoS One. 2011 Oct 25;6(10):e25509. doi: 10.1371/journal.pone.0025509 (PMC3201961; doi:10.1371/journal.pone.0025509)
Supplement: Table S1 — Examples of SNP count files. (XLS) [file pone.0025509.s005.xls]

## Sheet: Table S1
Table S1A: Part of an S288c SNP count file.
S288c Chromosome #	Position	Base	YJM789 Chromosome #	Position	Base	Placeholder	Reads with S288c sequence	Reads with YJM sequence	Reads with other sequence	Quality sum for S288c sequence	Quality sum for YJM789 sequence	Quality sum for other sequences	Read count for "A"	Read count for "C"	Read count for "G"	Read count for "T"	Read count for "N"
Chr05	39166	T	chrV.Contig317	32865	G		18	0	0	408	0	0	0	0	0	18	0
Chr05	39651	T	chrV.Contig317	33350	A		25	0	0	681	0	0	0	0	0	25	0
Chr05	40307	A	chrV.Contig317	34003	G		16	0	0	454	0	0	16	0	0	0	0
Chr05	40623	A	chrV.Contig317	34319	G		8	0	0	162	0	0	8	0	0	0	0
Chr05	40634	T	chrV.Contig317	34330	A		8	0	0	183	0	0	0	0	0	8	0
Chr05	40835	A	chrV.Contig317	34531	G		17	0	0	369	0	0	17	0	0	0	0
Chr05	40988	A	chrV.Contig317	34684	G		21	0	0	513	0	0	21	0	0	0	0
Chr05	41045	C	chrV.Contig317	34741	T		11	0	0	236	0	0	0	11	0	0	0
Chr05	41069	A	chrV.Contig317	34765	G		16	0	0	416	0	0	16	0	0	0	0
Chr05	41138	C	chrV.Contig317	34834	T		0	0	0	0	0	0	0	0	0	0	0
Chr05	41432	C	chrV.Contig317	35128	G		1	1	1	8	2	2	0	1	1	1	0
Chr05	41545	T	chrV.Contig317	35241	C		0	1	0	0	2	0	0	1	0	0	0
Chr05	41687	A	chrV.Contig317	35392	C		0	1	0	0	2	0	0	1	0	0	0
Chr05	42238	A	chrV.Contig317	35943	T		0	0	0	0	0	0	0	0	0	0	0
Chr05	42490	G	chrV.Contig317	36195	A		0	0	0	0	0	0	0	0	0	0	0
Chr05	42959	A	chrV.Contig317	36666	G		0	0	0	0	0	0	0	0	0	0	0
Chr05	43074	T	chrV.Contig317	36781	C		0	0	0	0	0	0	0	0	0	0	0
Chr05	44403	T	chrV.Contig317	38110	C		0	0	0	0	0	0	0	0	0	0	0
Chr05	44518	G	chrV.Contig317	38225	A		0	0	0	0	0	0	0	0	0	0	0
Chr05	44999	C	chrV.Contig317	38706	G		0	0	0	0	0	0	0	0	0	0	0
Chr05	45229	A	chrV.Contig317	38936	G		0	1	0	0	2	0	0	0	1	0	0
Chr05	45296	G	chrV.Contig317	39003	A		0	0	0	0	0	0	0	0	0	0	0
Table S1B: Part of a YJM789 SNP count file.
S288c Chromosome #	Position	Base	YJM789 Chromosome #	Position	Base	Placeholder	Reads with S288c sequence	Reads with YJM sequence	Reads with other sequence	Quality sum for S288c sequence	Quality sum for YJM789 sequence	Quality sum for other sequences	Read count for "A"	Read count for "C"	Read count for "G"	Read count for "T"	Read count for "N"
Chr05	39166	T	chrV.Contig317	32865	G		0	0	0	0	0	0	0	0	0	0	0
Chr05	39651	T	chrV.Contig317	33350	A		0	1	0	0	2	0	1	0	0	0	0
Chr05	40307	A	chrV.Contig317	34003	G		0	0	0	0	0	0	0	0	0	0	0
Chr05	40623	A	chrV.Contig317	34319	G		0	0	0	0	0	0	0	0	0	0	0
Chr05	40634	T	chrV.Contig317	34330	A		0	0	0	0	0	0	0	0	0	0	0
Chr05	40835	A	chrV.Contig317	34531	G		0	0	0	0	0	0	0	0	0	0	0
Chr05	40988	A	chrV.Contig317	34684	G		0	0	0	0	0	0	0	0	0	0	0
Chr05	41045	C	chrV.Contig317	34741	T		0	0	0	0	0	0	0	0	0	0	0
Chr05	41069	A	chrV.Contig317	34765	G		0	0	1	0	0	4	0	1	0	0	0
Chr05	41138	C	chrV.Contig317	34834	T		0	20	0	0	599	0	0	0	0	20	0
Chr05	41432	C	chrV.Contig317	35128	G		0	19	0	0	450	0	0	0	19	0	0
Chr05	41545	T	chrV.Contig317	35241	C		0	15	0	0	400	0	0	15	0	0	0
Chr05	41687	A	chrV.Contig317	35392	C		0	15	0	0	426	0	0	15	0	0	0
Chr05	42238	A	chrV.Contig317	35943	T		0	18	0	0	479	0	0	0	0	18	0
Chr05	42490	G	chrV.Contig317	36195	A		0	22	0	0	534	0	22	0	0	0	0
Chr05	42959	A	chrV.Contig317	36666	G		0	26	0	0	789	0	0	0	26	0	0
Chr05	43074	T	chrV.Contig317	36781	C		0	25	0	0	657	0	0	25	0	0	0
Chr05	44403	T	chrV.Contig317	38110	C		0	31	0	0	805	0	0	31	0	0	0
Chr05	44518	G	chrV.Contig317	38225	A		0	41	0	0	1224	0	41	0	0	0	0
Chr05	44999	C	chrV.Contig317	38706	G		0	40	0	0	1248	0	0	0	40	0	0
Chr05	45229	A	chrV.Contig317	38936	G		0	17	0	0	511	0	0	0	17	0	0
Chr05	45296	G	chrV.Contig317	39003	A		0	32	0	0	856	0	32	0	0	0	0
A portion of the S288c SNP count file (A) and YJM789 SNP count file (B) is shown for a region of chromosome 5 in spore wtx30c. (A) S288c SNP count file. This file counts only reads aligning to the S288c genome. Each row corresponds to one SNP. The first six columns list the bases and positions of SNPs in both reference genomes.The next 11 columns show information about the number and quality scor…
