# Supplementary material for: ReCombine: A Suite of Programs for Detection and Analysis of Meiotic Recombination in Whole-Genome Datasets
Source: PLoS One. 2011 Oct 25;6(10):e25509. doi: 10.1371/journal.pone.0025509 (PMC3201961; doi:10.1371/journal.pone.0025509)
Supplement: Table S4 — Example of an indel master file. (XLS) [file pone.0025509.s008.xls]

## Sheet: Table S4
Table S4: Part of an indel master file
S288c Chromosome #	Position	S288c call	S288c quality score	YJM789 call	YJM789 quality score
5	39905	W	504	X	53
5	40018	W	430	X	62
5	42850	X	61	M	349
Based on the indel count files shown in Tables S3A and S3B, ReadAligner determines a base call by separately considering reads aligning to each reference genome. The column labeled "S288c call" lists the base call determined by reads aligning to the S288c reference genome; "YJM789 call" lists the base call determined by reads aligning to the YJM789 reference genome. The quality score columns show…
4	43858	W	577	X	21
