# Supplementary material for: ReCombine: A Suite of Programs for Detection and Analysis of Meiotic Recombination in Whole-Genome Datasets
Source: PLoS One. 2011 Oct 25;6(10):e25509. doi: 10.1371/journal.pone.0025509 (PMC3201961; doi:10.1371/journal.pone.0025509)
Supplement: Table S7 — Examples of SNP and indel lists. (XLS) [file pone.0025509.s011.xls]

## Sheet: Table S7
Table S7A: Part of a SNP/indel list
S288c Chr #	S288c start	S288c end	polymorphism type	S288C seq	To	YJM789 seq	YJM789 contig	YJM789 start	YJM789 end
Chr05	39166	39166	S	T	>	G	chrV.Contig317	32865	32865
Chr05	39651	39651	S	T	>	A	chrV.Contig317	33350	33350
Chr05	39905	39906	D	AA	>	-	chrV.Contig317	33603	33604
Chr05	40018	40018	D	A	>	-	chrV.Contig317	33714	33715
Chr05	40307	40307	S	A	>	G	chrV.Contig317	34003	34003
Chr05	40623	40623	S	A	>	G	chrV.Contig317	34319	34319
Chr05	40634	40634	S	T	>	A	chrV.Contig317	34330	34330
Chr05	40835	40835	S	A	>	G	chrV.Contig317	34531	34531
Chr05	40988	40988	S	A	>	G	chrV.Contig317	34684	34684
Chr05	41045	41045	S	C	>	T	chrV.Contig317	34741	34741
Chr05	41069	41069	S	A	>	G	chrV.Contig317	34765	34765
Chr05	41138	41138	S	C	>	T	chrV.Contig317	34834	34834
Chr05	41432	41432	S	C	>	G	chrV.Contig317	35128	35128
Chr05	41545	41545	S	T	>	C	chrV.Contig317	35241	35241
Chr05	41687	41687	S	A	>	C	chrV.Contig317	35392	35392
Chr05	42238	42238	S	A	>	T	chrV.Contig317	35943	35943
Chr05	42490	42490	S	G	>	A	chrV.Contig317	36195	36195
Chr05	42850	42851	I	-	>	TG	chrV.Contig317	36556	36557
Chr05	42959	42959	S	A	>	G	chrV.Contig317	36666	36666
Chr05	43074	43074	S	T	>	C	chrV.Contig317	36781	36781
Chr05	44403	44403	S	T	>	C	chrV.Contig317	38110	38110
Chr05	44518	44518	S	G	>	A	chrV.Contig317	38225	38225
Chr05	44999	44999	S	C	>	G	chrV.Contig317	38706	38706
Chr05	45229	45229	S	A	>	G	chrV.Contig317	38936	38936
Chr05	45296	45296	S	G	>	A	chrV.Contig317	39003	39003
Table S7B: Part of a "telomere" or S288c-only SNP list
Chr #	Pos	S288c	YJM789
1	101	G	A
1	192	C	T
1	194	T	C
1	286	A	T
1	667	G	A
1	929	A	C
1	224005	T	A
1	224775	A	G
1	227539	A	T
1	227611	C	T
1	227656	G	A
1	227698	A	C
1	229089	C	T
1	229095	C	A
(A) A portion of the SNP/indel list for S288c vs. YJM789 is shown. In the column "polymorphism type", S indicates a SNP, D indicates a deletion, and I indicates an insertion. The "To" column is a placeholder and can contain any character. (B) A portion of the "telomere" SNP list for S288c vs. YJM789 is shown. This list contains information about SNPs whose locations are known only in the S288c re…
